# Supplementary material for: Behavioural Changes in Zoo Animals during the COVID-19 Pandemic: A Long-Term, Multi Species Comparison
Source: MDPI journal article supplement (doi:10.3390/jzbg3040044), 2022-11-15
Supplement: s1 [file s1]

## Supplementary material

Table S1. Summary of model outputs for the four species held at four zoological collections in the UK (HAI: human animal interactions, OOS: out of sight). Statistically significant differences have been highlighted in bold.

| Species   | Location        | Comparison                | Behaviour                           | Model output                              | AIC           | Confidence intervals |              |
|-----------|-----------------|---------------------------|-------------------------------------|-------------------------------------------|---------------|----------------------|--------------|
|           |                 |                           |                                     |                                           |               | 2.5%                 | 97.5%        |
| Wallabies | White Post Farm | Open vs closed            | Alert                               | -0.037±0.175, Z=-0.211, p=0.833           | 1332.9        | -0.38                | 0.31         |
|           |                 |                           | <b>Feeding</b>                      | <b>0.429±0.105, Z=4.076, p&lt;0.001</b>   | <b>2057.5</b> | <b>0.22</b>          | <b>0.64</b>  |
|           |                 |                           | Comfort                             | 0.280±0.230, Z=1.216, p=0.224             | 812.5         | -0.17                | 0.74         |
|           |                 |                           | <b>Locomotion</b>                   | <b>0.536±0.181, Z=2.956, p=0.003</b>      | <b>941.6</b>  | <b>0.18</b>          | <b>0.89</b>  |
|           |                 |                           | <b>Resting</b>                      | <b>-0.646±0.097, Z=-6.654, p&lt;0.001</b> | <b>2297.8</b> | <b>-0.83</b>         | <b>0.45</b>  |
|           |                 |                           | <b>Positive HAIs</b>                | <b>-0.219±0.085, Z=-2.544, p=0.01</b>     | <b>302.0</b>  | <b>-1.51</b>         | <b>0.64</b>  |
|           |                 |                           | <b>Positive social interactions</b> | <b>-0.208±0.079, t=-2.634, p=0.009</b>    | <b>884.0</b>  | <b>-0.36</b>         | <b>-0.05</b> |
|           |                 |                           | <b>OOS</b>                          | <b>0.532±0.238, Z=2.239, p=0.03</b>       | <b>1316.3</b> | <b>0.08</b>          | <b>1.01</b>  |
|           |                 | Open period comparisons   | Alert                               | 0.002±0.054, Z=0.031, p=0.975             | 920.2         | -0.10                | 0.11         |
|           |                 |                           | Feeding                             | -0.032±0.037, Z=-0.865, p=0.387           | 1369.7        | -0.11                | 0.04         |
|           |                 |                           | Comfort                             | -0.050±0.032, Z=-1.568, p=0.118           | 827.8         | -0.11                | 0.01         |
|           |                 |                           | <b>Rest</b>                         | <b>0.076±0.024, Z=3.206, p=0.001</b>      | <b>1672.6</b> | <b>0.03</b>          | <b>0.12</b>  |
|           |                 |                           | <b>Locomotion</b>                   | <b>-0.219±0.072, Z=-3.051, p=0.002</b>    | <b>569.0</b>  | <b>-0.36</b>         | <b>-0.08</b> |
|           |                 |                           | OOS                                 | -0.082±0.075, Z=-1.092, p=0.275           | 827.8         | -0.23                | 0.07         |
|           |                 | Weeks since reopening     | <b>Alert</b>                        | <b>0.038±0.017, Z=-2.204, p=0.028</b>     | <b>915.4</b>  | <b>-0.07</b>         | <b>0.004</b> |
|           |                 |                           | Feeding                             | -0.012±0.013, Z=-0.911, p=0.362           | 1369.6        | -0.04                | 0.01         |
|           |                 |                           | Comfort                             | 0.023±0.013, t=1.867, p=0.063             | 828.6         | -0.001               | 0.05         |
|           |                 |                           | Resting                             | -0.001±0.011, Z=-0.131, p=0.896           | 1682.6        | -0.02                | 0.02         |
|           |                 |                           | Locomotion                          | 0.013±0.014, t=0.881, p=0.379             | 900.8         | -0.02                | 0.04         |
|           |                 |                           | OOS                                 | 0.028±0.030, Z=0.951, p=0.341             | 828.1         | -0.03                | 0.09         |
|           |                 | Closed period comparisons | Alert                               | -0.100±0.304, Z=-0.328, p=0.725           | 401.5         | -0.71                | 0.49         |
|           |                 |                           | <b>Feeding</b>                      | <b>0.433±0.145, Z=2.998, p=0.003</b>      | <b>644.2</b>  | <b>0.15</b>          | <b>0.72</b>  |
|           |                 |                           | Comfort                             | -0.787±0.447, Z=-1.760, p=0.079           | 265.0         | -1.70                | 0.07         |
|           |                 |                           | Locomotion                          | -0.212±0.270, Z=-0.784, p=0.433           | 350.4         | -0.74                | 0.32         |
|           |                 |                           | Resting                             | -0.116±0.216, Z=-0.538, p=0.591           | 593.2         | -0.55                | 0.30         |

|         |                 |                                                              |                                     |                                           |               |              |              |
|---------|-----------------|--------------------------------------------------------------|-------------------------------------|-------------------------------------------|---------------|--------------|--------------|
|         |                 |                                                              | OOS                                 | -0.326±0.374, Z=-0.870, p=0.384           | 479.9         | -1.10        | 0.38         |
| Rabbits | White Post Farm | Open vs closed                                               | Feeding                             | -0.077±0.183, Z=-0.423, p=0.672           | 920.9         | -0.44        | 0.28         |
|         |                 |                                                              | <b>Alert</b>                        | <b>-1.003±0.215, Z=-4.675, p&lt;0.001</b> | <b>538.7</b>  | <b>-1.42</b> | <b>-0.59</b> |
|         |                 |                                                              | <b>Positive social interactions</b> | <b>-0.513±0.261, Z=-2.041, p=0.041</b>    | <b>413.2</b>  | <b>-1.01</b> | <b>-0.02</b> |
|         |                 |                                                              | <b>Resting</b>                      | <b>0.357±0.098, Z=3.646, p&lt;0.001</b>   | <b>1242.6</b> | <b>0.16</b>  | <b>0.55</b>  |
|         |                 |                                                              | Positive HAIs                       | -0.130±0.274, Z=-0.473, p=0.636           | 347.6         | -0.67        | 0.41         |
|         |                 |                                                              | Comfort                             | -0.122±0.155, Z=-0.791, p=0.429           | 795.3         | -0.44        | 0.17         |
|         |                 |                                                              | Locomotion                          | -0.138±0.225, Z=-0.614, p=0.539           | 467.8         | -0.58        | 0.30         |
|         |                 |                                                              | Environmental interactions          | -0.257±0.349, Z=-0.737, p=0.461           | 293.5         | -0.94        | 0.43         |
|         |                 |                                                              | OOS                                 | -0.422±0.334, Z=-1.264, p=0.206           | 6995.9        | -1.10        | 0.24         |
|         |                 | Closed periods (lockdown 2 vs lockdown 3)                    | Alert                               | -0.445±0.278, Z=-1.601, p=0.109           | 278.2         | -0.99        | 0.10         |
|         |                 |                                                              | Positive HAIs                       | -0.028±0.436, Z=-0.063, p=0.950           | 147.4         | -0.87        | 0.85         |
|         |                 |                                                              | Feeding                             | -0.307±0.252, Z=-1.217, p=0.224           | 368.1         | -0.81        | 0.18         |
|         |                 |                                                              | Comfort                             | -0.255±0.246, Z=-1.039, p=0.299           | 321.4         | -0.74        | 0.22         |
|         |                 |                                                              | Positive social interactions        | -0.081±0.346, Z=-0.235, p=0.814           | 193.7         | -0.76        | 0.60         |
|         |                 |                                                              | Locomotion                          | -0.498±0.285, Z=-1.75, p=0.080            | 188.7         | -1.06        | 0.06         |
|         |                 |                                                              | Environmental interactions          | 0.343±0.246, t=1.396, p=0.167             | 245.9         | -0.14        | 0.82         |
|         |                 |                                                              | Resting                             | 0.035±0.193, Z=0.182, p=0.856             | 465.8         | -0.35        | 0.41         |
|         |                 |                                                              | <b>OOS</b>                          | <b>1.2469±0.4842, Z=2.575, p=0.01</b>     | <b>295.7</b>  | <b>0.26</b>  | <b>2.18</b>  |
|         |                 | Open period comparisons (post lockdown 1 vs post lockdown 2) | Feeding                             | -0.789±0.421, Z=-1.874, p=0.061           | 551.2         | -1.59        | 0.08         |
|         |                 |                                                              | Comfort                             | 0.487±0.293, Z=1.663, p=0.096             | 477.5         | -0.08        | 1.08         |
|         |                 |                                                              | <b>Positive HAIs</b>                | <b>1.259±0.386, Z=3.265, p=0.001</b>      | <b>199.1</b>  | <b>0.19</b>  | <b>2.01</b>  |
|         |                 |                                                              | <b>Locomotion</b>                   | <b>0.596±0.290, Z=2.057, p=0.042</b>      | <b>389.4</b>  | <b>0.03</b>  | <b>1.16</b>  |
|         |                 |                                                              | <b>Alert</b>                        | <b>0.675±0.092, Z=-6.101, p&lt;0.001</b>  | <b>370.3</b>  | <b>0.15</b>  | <b>1.20</b>  |
|         |                 |                                                              | Positive social interactions        | 0.070±0.246, Z=0.283, p=0.778             | 348.6         | -0.41        | 0.55         |
|         |                 |                                                              | Resting                             | -0.233±0.170, Z=-1.367, p=0.172           | 777.6         | -0.56        | 0.11         |
|         |                 |                                                              | OOS                                 | -0.370±0.722, Z=0.513, p=0.608            | 364.2         | -0.88        | 2.07         |

|        |                 |                             |                              |                                           |              |              |              |
|--------|-----------------|-----------------------------|------------------------------|-------------------------------------------|--------------|--------------|--------------|
|        |                 | Weeks since reopening       | Alert                        | -0.009±0.019, t=-0.479, p=0.633           | 381.6        | -0.05        | 0.03         |
|        |                 |                             | Comfort                      | -0.007±0.020, Z=-0.334, p=0.739           | 480.2        | -0.05        | 0.03         |
|        |                 |                             | <b>Feeding</b>               | <b>0.064±0.028, Z=2.272, p=0.023</b>      | <b>556.9</b> | -            | -            |
|        |                 |                             | <b>Positive HAIs</b>         | <b>0.099±0.030, t=-3.269, p=0.001</b>     | <b>198.2</b> | -            | -            |
|        |                 |                             | Positive social interactions | 0.005±0.017, t=0.322, p=0.748             | 353.9        | -0.03        | 0.04         |
|        |                 |                             | Locomotion                   | -0.024±0.020, t=-1.179, p=0.240           | 397.5        | -0.06        | 0.02         |
|        |                 |                             | Resting                      | 0.005±0.012, Z=0.454, p=0.650             | 779.2        | -0.02        | 0.03         |
|        |                 |                             | OOS                          | -0.049±0.059, Z=-0.827, p=0.480           | 363.7        | -0.18        | 0.06         |
| Macaws | White Post Farm | Open vs closed (lockdown 3) | Alert                        | -0.343±0.356, Z=-0.964, p=0.335           | 266.4        | -1.05        | 0.35         |
|        |                 |                             | <b>Feeding</b>               | <b>-0.900±0.338, Z=-2.666, p=0.008</b>    | <b>271.9</b> | <b>-1.58</b> | <b>-0.25</b> |
|        |                 |                             | <b>Preening</b>              | <b>0.866±0.349, Z=2.479, p=0.013</b>      | <b>198.0</b> | <b>0.20</b>  | <b>1.57</b>  |
|        |                 |                             | Positive social interactions | -0.500±0.402, Z=-1.245, p=0.213           | 220.5        | -1.31        | 0.28         |
|        |                 |                             | <b>Resting</b>               | <b>0.545±0.197, Z=2.768, p=0.006</b>      | <b>405.5</b> | <b>0.16</b>  | <b>0.93</b>  |
|        |                 |                             | Locomotion                   | -0.340±0.229, t=-1.748, p=0.08            | 226.1        | -0.85        | 0.05         |
|        |                 |                             | Environmental interactions   | -0.204±0.403, Z=-0.506, p=0.613           | 192.6        | -1.01        | 0.60         |
|        |                 |                             | Positive HAIs                | -0.455±0.476, Z=-0.957, p=0.339           | 108.6        | -1.41        | 0.48         |
|        |                 | Open period comparisons     | Positive HAIs                | -0.112±0.131, t=-0.855, p=0.393           | 449.8        | -0.12        | 0.12         |
|        |                 |                             | <b>Alert</b>                 | <b>-0.351±0.041, Z=-8.588, p&lt;0.001</b> | <b>595.1</b> | <b>-0.43</b> | <b>0.27</b>  |
|        |                 |                             | <b>Feeding</b>               | <b>-0.163±0.075, Z=-2.175, p=0.03</b>     | <b>484.9</b> | <b>-0.31</b> | <b>0.02</b>  |
|        |                 |                             | <b>Comfort</b>               | <b>0.216±0.074, Z=2.929, p=0.003</b>      | <b>308.2</b> | <b>0.07</b>  | <b>0.36</b>  |
|        |                 |                             | <b>Resting</b>               | <b>-0.364±0.054, Z=6.722, p&lt;0.001</b>  | <b>571.8</b> | <b>0.26</b>  | <b>0.47</b>  |
|        |                 |                             | Locomotion                   | 0.139±0.075, Z=-1.842, p=0.070            | 264.1        | -0.01        | 0.29         |
|        |                 |                             | Environmental interactions   | 0.122±0.098, Z=1.248, p=0.212             | 285.0        | -0.07        | 0.32         |
|        |                 |                             | Positive social interactions | -0.075±0.079, Z=-0.941, p=0.347           | 398.7        | -0.23        | 0.08         |
|        |                 | Weeks since reopening       | Alert                        | 0.031±0.021, Z=1.481, p=0.139             | 655.6        | -0.10        | 0.07         |
|        |                 |                             | Locomotion                   | 0.019±0.033, Z=0.565, p=0.572             | 267.1        | -0.05        | 0.08         |
|        |                 |                             | Environmental                | -0.042±0.043, Z=-0.978, p=0.328           | 285.6        | -0.13        | 0.04         |

|  |           |                                     |                                   |                                           |              |              |              |
|--|-----------|-------------------------------------|-----------------------------------|-------------------------------------------|--------------|--------------|--------------|
|  |           |                                     | interactions                      |                                           |              |              |              |
|  |           |                                     | Positive HAIs                     | -0.033±0.027, t=-1.241 p=0.217            | 449.9        | -0.09        | 0.02         |
|  |           |                                     | Positive social interactions      | -0.0003±0.032, Z=-0.011, p=0.992          | 399.6        | -0.06        | 0.06         |
|  |           |                                     | Comfort                           | -0.063±0.039, Z=-1.641, p=0.101           | 308.2        | 0.07         | 0.36         |
|  |           |                                     | Feeding                           | 0.044±0.029, Z=1.495, p=0.135             | 487.2        | -0.01        | 0.10         |
|  |           |                                     | Resting                           | -0.049±0.031, Z=-1.579, p=0.114           | 604.9        | -0.11        | 0.01         |
|  | Plantasia | Open vs closed periods (lockdown 1) | <b>Vigilant</b>                   | <b>-0.435±0.100, Z=-4.332, p&lt;0.001</b> | <b>395.8</b> | <b>-0.63</b> | <b>-0.23</b> |
|  |           |                                     | Positive HAIs                     | -0.276±0.514, Z=-0.538, p=0.591           | 134.9        | -1.29        | 0.73         |
|  |           |                                     | Feeding                           | 0.331±0.387, Z=0.856, p=0.392             | 234.9        | -0.44        | 1.09         |
|  |           |                                     | Preening                          | 0.494±0.474, Z=1.043, p=0.297             | 215.1        | -0.45        | 1.41         |
|  |           |                                     | Locomotion                        | 0.072±0.321, Z=0.224, p=0.822             | 178.9        | -0.55        | 0.71         |
|  |           |                                     | Resting                           | 0.715±0.418, Z=1.712, p=0.087             | 223.0        | -0.11        | 1.53         |
|  |           |                                     | ARBs                              | 0.325±0.300, Z=1.081, p=0.280             | 257.0        | -0.27        | 0.92         |
|  |           |                                     | <b>Environmental interactions</b> | <b>1.062±0.445, Z=2.386, p=0.017</b>      | <b>185.0</b> | <b>0.20</b>  | <b>1.96</b>  |
|  |           | Open period comparisons             | Perched alert                     | 0.186±0.109, Z=1.708, p=0.088             | 591.4        | -0.01        | 0.20         |
|  |           |                                     | Environmental interactions        | -0.356±0.314, Z=-1.136, p=0.256           | 286.0        | -0.49        | 0.13         |
|  |           |                                     | Feeding                           | -0.166±0.360, Z=0.465, p=0.642            | 330.6        | -0.44        | 0.27         |
|  |           |                                     | Preening                          | 0.039±0.330, Z=0.120, p=0.905             | 345.3        | -0.31        | 0.34         |
|  |           |                                     | Locomotion                        | -0.500±0.360, Z=-1.388, p=0.165           | 222.7        | -0.61        | 0.10         |
|  |           |                                     | <b>Positive HAIs</b>              | <b>-2.046±0.666, Z=-3.073, p=0.002</b>    | <b>108.2</b> | <b>-1.78</b> | <b>-0.42</b> |
|  |           |                                     | <b>Vocalising</b>                 | <b>1.216±0.553, Z=2.201, p=0.028</b>      | <b>119.3</b> | <b>0.07</b>  | <b>1.26</b>  |
|  |           |                                     | Resting                           | 0.291±0.327, Z=0.891, p=0.373             | 381.8        | -0.18        | 0.47         |
|  |           |                                     | ARBs                              | -0.304±0.666, Z=-1.060, p=0.289           | 356.8        | -0.44        | 0.13         |
|  |           | Weeks since reopening               | Perched alert                     | -0.005±0.019, Z=-1.708, p=0.779           | 594.2        | -0.04        | 0.03         |
|  |           |                                     | Environmental interactions        | -0.044±0.056, Z=-0.788, p=0.431           | 286.9        | -0.17        | 0.08         |
|  |           |                                     | Feeding                           | -0.005±0.062, Z=-0.078, p=0.938           | 330.8        | -0.14        | 0.14         |
|  |           |                                     | Preening                          | 0.006±0.057, Z=0.100, p=0.920             | 345.3        | -0.12        | 0.14         |
|  |           |                                     | Locomotion                        | 0.006±0.064, Z=0.099, p=0.921             | 224.6        | -0.13        | 0.15         |

|          |                 |                            |                            |                                           |              |              |              |
|----------|-----------------|----------------------------|----------------------------|-------------------------------------------|--------------|--------------|--------------|
| Meerkats | White Post Farm |                            | Resting                    | 0.057±0.055, Z=1.036, p=0.300             | 381.2        | -0.04        | 0.03         |
|          |                 |                            | ARBs                       | -0.062±0.051, Z=-1.214, p=0.225           | 356.3        | -0.16        | 0.03         |
|          |                 |                            | Positive HAIs              | 0.064±0.098, Z=0.655, p=0.512             | 118.8        | -0.16        | 0.29         |
|          |                 |                            | Vocalisations              | -0.034±0.770, t=-0.438, p=0.662           | 124.6        | -0.21        | 0.13         |
|          |                 | Open vs closed periods     | Positive HAIs              | -0.668±0.605, Z=-1.104, p=0.269           | 199.7        | -1.88        | 0.51         |
|          |                 |                            | Feeding                    | 0.046±0.262, Z=0.174, p=0.862             | 469.7        | -0.47        | 0.56         |
|          |                 |                            | Locomotion                 | 0.214±0.306, Z=0.699, p=0.485             | 351.4        | -0.39        | 0.81         |
|          |                 |                            | Environmental interactions | -0.560±0.544, Z=-1.028, p=0.304           | 180.6        | -1.65        | 0.49         |
|          |                 |                            | Resting                    | 0.767±0.426, Z=1.800, p=0.072             | 284.2        | -0.08        | 1.60         |
|          |                 |                            | <b>Alert</b>               | <b>0.366±0.141, Z=2.601, p=0.009</b>      | <b>466.1</b> | <b>0.09</b>  | <b>0.64</b>  |
|          |                 |                            | <b>Comfort</b>             | <b>0.804±0.380, Z=2.119, p=0.034</b>      | <b>189.6</b> | <b>0.07</b>  | <b>1.55</b>  |
|          |                 |                            | <b>OOS</b>                 | <b>-0.638±0.240, Z=-2.662, p=0.008</b>    | <b>491.8</b> | <b>-1.12</b> | <b>-0.17</b> |
|          |                 | Closure period comparisons | Positive HAIs              | -1.939±1.248, Z=-1.553, p=0.120           | 80.9         | -5.13        | 0.57         |
|          |                 |                            | Feeding                    | 0.295±0.518, Z=0.569, p=0.569             | 210.5        | -0.66        | 1.39         |
|          |                 |                            | Environmental interactions | 0.059±0.788, Z=0.075, p=0.940             | 100.7        | -1.38        | 1.72         |
|          |                 |                            | <b>Locomotion</b>          | <b>-3.225±1.121, Z=-2.876, p=0.004</b>    | <b>133.1</b> | <b>-6.19</b> | <b>1.38</b>  |
|          |                 |                            | <b>Alert</b>               | <b>-1.105±0.309, Z=-3.581, p&lt;0.001</b> | <b>200.5</b> | <b>-1.70</b> | <b>-0.50</b> |
|          |                 |                            | Resting                    | -21.902±8722.960, Z=-0.003, p=-0.998      | 95.8         | -            | -            |
|          |                 |                            | Comfort                    | -0.524±0.417, t=-1.256, p=0.220           | 86.4         | -1.38        | 0.33         |
|          |                 |                            | OOS                        | 0.575±0.313, Z=1.837, p=0.066             | 237.1        | -0.02        | 1.22         |
|          |                 | Open period comparisons    | Alert                      | 0.058±0.157, Z=0.369, p=0.712             | 240.8        | -0.25        | 0.36         |
|          |                 |                            | Positive HAIs              | -0.065±0.886, Z=-0.073, p=0.942           | 71.8         | -1.97        | 1.61         |
|          |                 |                            | Feeding                    | 0.188±0.290, Z=0.648, p=0.517             | 249.5        | -0.40        | 0.74         |
|          |                 |                            | Comfort                    | 0.188±0.544, Z=0.346, p=0.730             | 120.4        | -0.92        | 1.23         |
|          |                 |                            | Locomotion                 | 0.107±0.412, Z=0.259, p=0.795             | 195.1        | -0.74        | 0.89         |
|          |                 |                            | Environmental interactions | -0.579±0.990, Z=-0.585, p=0.559           | 76.0         | -2.83        | 1.25         |
|          |                 |                            | ARBs                       | 0.420±0.405, t=1.038, p=0.307             | 108.7        | -0.40        | 1.24         |
|          |                 |                            | <b>Resting</b>             | <b>1.358±0.485, Z=2.798, p=0.005</b>      | <b>173.0</b> | <b>0.37</b>  | <b>2.30</b>  |

|  |           |                             |                                   |                                        |              |              |                |
|--|-----------|-----------------------------|-----------------------------------|----------------------------------------|--------------|--------------|----------------|
|  |           |                             | <b>OOS</b>                        | <b>-0.792±0.383, Z=-2.067, p=0.038</b> | <b>228.6</b> | <b>-1.59</b> | <b>-0.07</b>   |
|  |           | Weeks since reopening       | Alert                             | -0.025±0.029, Z=-0.865, p=0.387        | 240.2        | -0.08        | 0.03           |
|  |           |                             | Positive HAls                     | -0.104±0.159, Z=-0.656, p=0.512        | 71.4         | -0.46        | 0.24           |
|  |           |                             | Feeding                           | 0.030±0.053, Z=0.560, p=0.575          | 249.6        | -0.08        | 0.14           |
|  |           |                             | Resting                           | 0.048±0.094, Z=0.512, p=0.609          | 179.0        | -0.20        | 0.28           |
|  |           |                             | <b>Comfort</b>                    | <b>0.248±0.117, Z=2.124, p=0.034</b>   | <b>116.5</b> | <b>0.01</b>  | <b>0.51</b>    |
|  |           |                             | Locomotion                        | -0.063±0.073, Z=-0.854, p=0.393        | 194.2        | -0.20        | 0.06           |
|  |           |                             | Environmental interactions        | -0.097±0.181, Z=-0.535, p=0.593        | 75.9         | -0.44        | 0.21           |
|  |           |                             | ARBs                              | -0.034±0.074, t=-0.465, p=0.645        | 109.6        | -0.18        | 0.12           |
|  |           |                             | OOS                               | 0.041±0.075, Z=0.547, p=0.585          | 232.6        | -0.11        | 0.18           |
|  | Plantasia | Open vs closed (lockdown 1) | Alert                             | 0.115±0.305, Z=0.377, p=0.706          | 285.3        | -0.49        | 0.71           |
|  |           |                             | Feeding                           | -0.623±0.476, Z=-1.309, p=0.191        | 186.6        | -1.58        | 0.30           |
|  |           |                             | Comfort                           | 0.123±0.336, Z=0.365, p=0.715          | 239.0        | -0.54        | 0.78           |
|  |           |                             | Locomotion                        | 0.155±0.417, Z=0.371, p=0.711          | 114.5        | -0.64        | 1.01           |
|  |           |                             | Resting                           | 0.333±0.211, Z=1.577, p=0.115          | 347.7        | -0.08        | 0.75           |
|  |           |                             | ARBs                              | -0.442±0.364, Z=-1.216, p=0.224        | 171.8        | -1.16        | 0.27           |
|  |           |                             | <b>Environmental interactions</b> | <b>-0.213±0.101, Z=-2.12, p=0.034</b>  | <b>347.4</b> | <b>-0.41</b> | <b>-0.02</b>   |
|  |           | Open period comparisons     | Alert                             | 0.110±0.086, Z=1.284, p=0.199          | 424.8        | -0.06        | 0.28           |
|  |           |                             | <b>Resting</b>                    | <b>-0.372±0.195, Z=-1.902, p=0.06</b>  | <b>493.9</b> | <b>-0.38</b> | <b>0.005</b>   |
|  |           |                             | ARBs                              | -0.074±0.178, Z=-0.416, p=0.677        | 212.0        | -0.42        | 0.28           |
|  |           |                             | Positive social interactions      | 0.762±0.242, Z=3.153, p                | 190.5        | 0.31         | 1.27           |
|  |           |                             | Feeding                           | 0.469±0.393, Z=1.196, p=0.232          | 273.6        | -0.15        | 0.62           |
|  |           |                             | Comfort                           | -0.346±0.284, Z=-1.218, p=0.223        | 319.1        | -0.45        | 0.10           |
|  |           |                             | Locomotion                        | -0.126±0.069, Z=-1.808, p=0.070        | 181.7        | -0.30        | 0.44           |
|  |           |                             | Environmental interactions        | 0.091±0.096, Z=0.949, p=0.340          | 512.7        | -0.05        | 0.14           |
|  |           | Weeks since reopening       | Feeding                           | -0.025±0.067, Z=-0.370, p=0.710        | 274.9        | -0.16        | 0.11           |
|  |           |                             | Comfort                           | 0.0165±0.049, Z=0.338, p=0.740         | 320.5        | -0.45        | 0.10           |
|  |           |                             | <b>Alert</b>                      | <b>-0.059±0.030, Z=-2.005, p=0.04</b>  | <b>422.6</b> | <b>-0.12</b> | <b>-0.0003</b> |

|  |                 |                            |                              |                                           |              |              |              |
|--|-----------------|----------------------------|------------------------------|-------------------------------------------|--------------|--------------|--------------|
|  |                 |                            | ARBs                         | -0.093±0.064, Z=-1.445, p=0.149           | 210.1        | -0.23        | 0.03         |
|  |                 |                            | Positive social interactions | 0.111±0.069, Z=1.612, p=0.107             | 198.8        | -0.03        | 0.26         |
|  |                 |                            | Locomotion                   | -0.126±0.069, Z=-1.808, p=0.070           | 178.7        | -0.28        | 0.01         |
|  |                 |                            | Environmental interactions   | 0.001±0.016, Z=0.088, p=0.930             | 513.6        | -0.03        | 0.03         |
|  |                 |                            | Resting                      | 0.047±0.033, Z=1.410, p=0.160             | 495.2        | -0.01        | 0.11         |
|  | Knowsley Safari | Open vs closed             | Alert                        | 0.095±0.131, Z=0.721, p=0.471             | 314.5        | -0.16        | 0.36         |
|  |                 |                            | Positive HAIs                | -0.312±0.426, Z=-0.733, p=0.464           | 145.2        | -1.13        | 0.53         |
|  |                 |                            | Feeding                      | -0.058±0.151, Z=-0.386, p=0.699           | 310.1        | -0.35        | 0.24         |
|  |                 |                            | Comfort                      | 0.063±0.471, Z=0.135, p=0.893             | 281.8        | -0.96        | 0.96         |
|  |                 |                            | Positive social interactions | 0.141±0.356, Z=1.163, p=0.245             | 318.4        | -0.33        | 1.11         |
|  |                 |                            | Negative social interactions | 0.445±0.556, Z=0.801, p=0.4233            | 154.2        | -0.61        | 1.54         |
|  |                 |                            | Locomotion                   | -0.115±0.223, Z=-0.516, p=0.606           | 341.0        | -0.56        | 0.31         |
|  |                 |                            | Environmental interactions   | 0.377±0.316, Z=1.193, p=0.230             | 320.6        | -0.26        | 0.98         |
|  |                 |                            | Resting                      | 0.231±0.413, Z=0.559, p=0.576             | 316.4        | -0.65        | 1.01         |
|  |                 |                            | OOS                          | -0.688±0.701, Z=-0.981, p=0.326           | 157.7        | -2.31        | 0.65         |
|  |                 | Closure period comparisons | Alert                        | -0.227±0.389, Z=-0.582, p=0.561           | 46.6         | -0.99        | 0.52         |
|  |                 |                            | Feeding                      | -0.770±0.329, Z=-2.337, p=0.019           | -1.47        | -0.17        | 38.3         |
|  |                 |                            | Comfort                      | 1.249±0.674, Z=1.855, p=0.064             | 38.8         | -0.07        | 2.62         |
|  |                 |                            | Positive social interactions | 1.121±0.612, Z=1.821, p=0.069             | 40.0         | -0.09        | 2.36         |
|  |                 |                            | Locomotion                   | -0.223±0.272, Z=-0.82, p=0.412            | 42.9         | -0.78        | 0.29         |
|  |                 |                            | Environmental interactions   | 0.323±0.539, Z=0.599, p=0.549             | 41.9         | -0.72        | 1.37         |
|  |                 |                            | Resting                      | 0.764±0.638, Z=1.197, p=0.231             | 40.5         | -0.50        | 2.05         |
|  |                 |                            | OOS                          | 1.562±1.250, Z=1.250, p=0.211             | 30.6         | -1.00        | 4.34         |
|  |                 | Weeks since reopening      | Alert                        | 0.001±0.009, Z=0.085, p=0.933             | 272.2        | -0.02        | 0.02         |
|  |                 |                            | <b>Positive HAIs</b>         | <b>-0.240±0.061, Z=-3.908, p&lt;0.001</b> | <b>104.5</b> | <b>-0.38</b> | <b>-0.13</b> |

|  |              |                         |                                     |                                           |              |              |               |
|--|--------------|-------------------------|-------------------------------------|-------------------------------------------|--------------|--------------|---------------|
|  |              |                         | <b>Feeding</b>                      | <b>-0.026±0.012, Z=-2.2, p=0.028</b>      | <b>266.5</b> | <b>-0.05</b> | <b>-0.003</b> |
|  |              |                         | Comfort                             | 0.016±0.0330, Z=0.472, p=0.637            | 245.8        | -0.05        | 0.09          |
|  |              |                         | Positive social interactions        | 0.022±0.023, Z=0.955, p=0.340             | 281.5        | -0.03        | 0.07          |
|  |              |                         | <b>Negative social interactions</b> | <b>-0.242±0.060, Z=-4.016, p&lt;0.001</b> | <b>118.7</b> | <b>-0.37</b> | <b>0.13</b>   |
|  |              |                         | <b>Locomotion</b>                   | <b>-0.051±0.016, Z=-3.114, p=0.002</b>    | <b>291.5</b> | <b>-0.08</b> | <b>0.02</b>   |
|  |              |                         | <b>Environmental interactions</b>   | <b>-0.047±0.022, Z=-2.107, p=0.035</b>    | <b>281.2</b> | <b>-0.09</b> | <b>-0.001</b> |
|  |              |                         | Resting                             | .0359±0.028, Z=1.980, p=0.195             | 278.7        | -0.02        | 0.10          |
|  |              |                         | OOS                                 | -0.003±0.052, Z=-0.065, p=0.948           | 131.5        | -0.12        | 0.11          |
|  | Dartmoor Zoo | Open period comparisons | Alert                               | -0.059±0.227, Z=-0.259, p=0.796           | 143.7        | -0.50        | 0.34          |
|  |              |                         | <b>Feeding</b>                      | <b>-2.603±0.705, Z=-3.694, p&lt;0.001</b> | <b>112.5</b> | <b>-4.07</b> | <b>-1.29</b>  |
|  |              |                         | Locomotion                          | -0.016±0.114, Z=-0.141, p=0.888           | 144.7        | -0.24        | 0.20          |
|  |              |                         | <b>Resting</b>                      | <b>1.227±0.412, Z=2.979, p=0.003</b>      | <b>128.8</b> | <b>0.42</b>  | <b>2.05</b>   |
|  |              |                         | Environmental interactions          | 0.281±0.295, Z=0.953, p=0.341             | 131.2        | -0.30        | 0.86          |
|  |              |                         | OOS                                 | 0.671±0.404, t=1.660, p=0.110             | 79.1         | -0.12        | 1.46          |
|  |              | Weeks since reopening   | Alert                               | 0.065±0.042, Z=-1.541, p=0.123            | 141.6        | -0.15        | 0.02          |
|  |              |                         | Resting                             | -0.038±0.094, Z=-0.401, p=0.689           | 136.1        | -0.22        | 0.13          |
|  |              |                         | <b>Environmental interactions</b>   | <b>-0.176±0.053, Z=-3.299, p&lt;0.001</b> | <b>123.2</b> | <b>-0.29</b> | <b>-0.06</b>  |
|  |              |                         | <b>Locomotion</b>                   | <b>-0.074±0.028, Z=2.597, p=0.009</b>     | <b>130.2</b> | <b>-0.02</b> | <b>0.13</b>   |
|  |              |                         | OOS                                 | -0.014±0.084, Z=-0.162, p=0.873           | 52.1         | -0.50        | 0.31          |
